# Supplementary material for: Alscholarines A and B, two rearranged monoterpene indole alkaloids from Alstonia scholaris
Source: Royal Society of Chemistry journal article supplement (doi:10.1039/d3ob01424j), 2023-01-01
Supplement: d3ob01424j1.pdf [file d3ob01424j1.pdf]

## *Supporting Information for*

# **Alscholarines A and B, two rearranged monoterpene indole alkaloids from *Alstonia scholaris***

Guanqun Zhan,<sup>‡</sup> Fuxin Zhang,<sup>‡</sup> Kailing Yang, Tao Yang, Ruixi Zhou, Wenwen Chen, Jingwei Zhang, Xinxin Zhang, Zengjun Guo\*

*School of Pharmacy, Health Science Center, Xi'an Jiaotong University, Xi'an 710061, P. R. China*

### **List of Supplementary Data**

|                                                                                                                                                          |   |
|----------------------------------------------------------------------------------------------------------------------------------------------------------|---|
| <b>1. Computational calculations section</b> .....                                                                                                       | 3 |
| 1.1 Conformational analysis and structure optimization.....                                                                                              | 3 |
| Table S1 Energies of molecule 1a at M062X/6-31G(d) level.....                                                                                            | 3 |
| Table S2 Energies of molecule 2a at M062X/6-31G(d) level.....                                                                                            | 3 |
| 1.2 NMR calculation .....                                                                                                                                | 3 |
| Table S3 Experimental and calculated <sup>13</sup> C NMR of 2 .....                                                                                      | 4 |
| 1.3 ECD calculation .....                                                                                                                                | 4 |
| <b>Table S1</b> Vasorelaxant activities of compounds 1–3 .....                                                                                           | 5 |
| <b>Table S2</b> Anti-inflammatory activity of compounds 1–3 on NO production in LPS-induced RAW264.7 mouse macrophages and the cell survival rates. .... | 5 |
| <b>Figure S1.</b> (+)-HR-ESI-MS spectrum of 1 .....                                                                                                      | 6 |
| <b>Figure S2.</b> UV spectrum of 1 in MeOH .....                                                                                                         | 6 |
| <b>Figure S3.</b> ECD spectrum of 1 in MeOH .....                                                                                                        | 7 |
| <b>Figure S4.</b> IR spectrum of 1 .....                                                                                                                 | 7 |

\* Corresponding authors:

Zengjun Guo: [orcid.org/0000-0003-3266-6280](https://orcid.org/0000-0003-3266-6280); TEL: +86-29-82655133 Email: [guozj@mail.xjtu.edu.cn](mailto:guozj@mail.xjtu.edu.cn)

|                                                                                                          |    |
|----------------------------------------------------------------------------------------------------------|----|
| <b>Figure S5.</b> $^1\text{H}$ NMR (600 MHz) spectrum of <b>1</b> in $\text{CD}_3\text{OD}$ .....        | 8  |
| <b>Figure S6.</b> $^{13}\text{C}$ NMR (150 MHz) spectrum of <b>1</b> in $\text{CD}_3\text{OD}$ .....     | 8  |
| <b>Figure S7.</b> DEPT 135 spectrum of <b>1</b> in $\text{CD}_3\text{OD}$ .....                          | 9  |
| <b>Figure S8.</b> HSQC spectrum of <b>1</b> in $\text{CD}_3\text{OD}$ .....                              | 9  |
| <b>Figure S9.</b> HMBC spectrum of <b>1</b> in $\text{CD}_3\text{OD}$ .....                              | 10 |
| <b>Figure S10.</b> $^1\text{H}$ - $^1\text{H}$ COSY spectrum of <b>1</b> in $\text{CD}_3\text{OD}$ ..... | 10 |
| <b>Figure S11.</b> NOESY spectrum of <b>1</b> in $\text{CD}_3\text{OD}$ .....                            | 11 |
| <b>Figure S12.</b> (+)-HR-ESI-MS spectrum of <b>2</b> .....                                              | 11 |
| <b>Figure S13.</b> UV spectrum of <b>2</b> in MeOH .....                                                 | 12 |
| <b>Figure S14.</b> ECD spectrum of <b>2</b> in MeOH .....                                                | 12 |
| <b>Figure S15.</b> IR spectrum of <b>2</b> .....                                                         | 13 |
| <b>Figure S16.</b> $^1\text{H}$ NMR (600 MHz) spectrum of <b>2</b> in $\text{CD}_3\text{OD}$ .....       | 13 |
| <b>Figure S17.</b> $^{13}\text{C}$ NMR (150 MHz) spectrum of <b>2</b> in $\text{CD}_3\text{OD}$ .....    | 14 |
| <b>Figure S18.</b> DEPT 135 spectrum of <b>2</b> in $\text{CD}_3\text{OD}$ .....                         | 14 |
| <b>Figure S19.</b> HSQC spectrum of <b>2</b> in $\text{CD}_3\text{OD}$ .....                             | 15 |
| <b>Figure S20.</b> HMBC spectrum of <b>2</b> in $\text{CD}_3\text{OD}$ .....                             | 15 |
| <b>Figure S21.</b> $^1\text{H}$ - $^1\text{H}$ COSY spectrum of <b>2</b> in $\text{CD}_3\text{OD}$ ..... | 16 |
| <b>Figure S22.</b> NOESY spectrum of <b>2</b> in $\text{CD}_3\text{OD}$ .....                            | 16 |

## 1. Computational calculations section

### 1.1 Conformational analysis and structure optimization

Conformational analysis was performed using OpenBabel with genetic algorithm at MMFF94 force field for the configurations of the calculated compounds.<sup>1</sup> The conformers of each configuration were then optimized with the software package Gaussian 09 at the M062X/6-31G(d) level.<sup>2</sup> Room-temperature equilibrium populations were calculated according to Boltzmann distribution law:

$$\frac{N_i}{N} = \frac{g_i e^{-\frac{E_i}{k_B T}}}{\sum g_i e^{-\frac{E_i}{k_B T}}}$$

where  $N_i$  is the number of conformer  $i$  with energy  $E_i$  and degeneracy  $g_i$  at temperature  $T$ , and  $k_B$  is Boltzmann constant.

**Table S1** Energies of molecule **1a** at M062X/6-31G(d) level.

| Conformers | Energy (Hartree) | Population (%) |
|------------|------------------|----------------|
| 1a-1       | -1204.3391457    | 50.01          |
| 1a-2       | -1204.3391455    | 49.99          |

**Table S2** Energies of molecule **2a** at M062X/6-31G(d) level.

| Conformers | Energy (Hartree) | Population (%) |
|------------|------------------|----------------|
| 2a-1       | -1186.461837     | 49.89          |
| 2a-2       | -1186.461810     | 48.47          |
| 2a-3       | -1186.458614     | 1.64           |

### 1.2 NMR calculation

NMR calculations were carried out by Gaussian 09 following the protocol adapted from Michael *et al.*<sup>3</sup> The theoretical calculation of NMR was conducted using the Gauge-Including Atomic Orbitals (GIAO) method at mPW1PW91/6-31G(d) by the SMD model. Finally, the calculated NMR chemical shift values were averaged according to Boltzmann distribution for each conformer and

1 O'Boyle, N. M.; Banck, M.; James, C. A.; Morley, C.; Vandermeersch, T.; Hutchison, G. R. *J. Cheminformatics* 2011, 3, 33.

2 Frisch, M. J.; Trucks, G. W.; Schlegel, H. B.; Scuseria, G. E.; Robb, M. A.; Cheeseman, J. R.; Scalmani, G.; Barone, V.; Mennucci, B.; Petersson, G. A.; Nakatsuji, H.; Caricato, M.; Li, X.; Hratchian, H. P.; Izmaylov, A. F.; Bloino, J.; Zheng, G.; Sonnenberg, J. L.; Hada, M.; Ehara, M.; Toyota, K.; Fukuda, R.; Hasegawa, J.; Ishida, M.; Nakajima, T.; Honda, Y.; Kitao, O.; Nakai, H.; Vreven, T.; Montgomery Jr, J. A.; Peralta, J. E.; Ogliaro, F.; Bearpark, M.; Heyd, J. J.; Brothers, E.; Kudin, K. N.; Staroverov, V. N.; Kobayashi, R.; Normand, J.; Raghavachari, K.; Rendell, A.; Burant, J. C.; Iyengar, S. S.; Tomasi, J.; Cossi, M.; Rega, N.; Millam, J. M.; Klene, M.; Knox, J. E.; Cross, J. B.; Bakken, V.; Adamo, C.; Jaramillo, J.; Gomperts, R.; Stratmann, R. E.; Yazyev, O.; Austin, A. J.; Cammi, R.; Pomelli, C.; Ochterski, J. W.; Martin, R. L.; Morokuma, K.; Zakrzewski, V. G.; Voth, G. A.; Salvador, P.; Dannenberg, J. J.; Dapprich, S.; Daniels, A. D.; Farkas, O.; Foresman, J. B.; Ortiz, J. V.; Cioslowski, J.; Fox, D. J. *Gaussian 09 Revision D.01*. Gaussian Inc. Wallingford CT **2009**.

3. Michael, W. L.; Matthew, R. S.; Dean, J. T. *Chem. Rev.* **2012**, 112, 1839–1862.

fitting to the experimental values by linear regression.

**Table S3** Experimental and calculated  $^{13}\text{C}$  NMR of **2**

| No | $\delta_{\text{exptl.}}$ | $\delta_{\text{calcd-1}}$ | $\delta_{\text{calcd-2}}$ | $\delta_{\text{calcd-3}}$ | $\delta_{\text{calcd}}$ | $\delta_{\text{calcd}} - \delta_{\text{expt}}$ | RMS<br>E |
|----|--------------------------|---------------------------|---------------------------|---------------------------|-------------------------|------------------------------------------------|----------|
| 2  | 133.<br>2                | 134.875956<br>8           | 134.908356<br>9           | 135.144070<br>5           | 134.<br>9               | 1.7                                            | 1.91     |
| 3  | 54.2                     | 53.4652406<br>4           | 53.4290657<br>4           | 52.7518087<br>4           | 53.4                    | -0.8                                           |          |
| 6  | 28                       | 28.0066058<br>5           | 27.9990563<br>1           | 28.2516514<br>6           | 28.0                    | 0.0                                            |          |
| 7  | 110.<br>8                | 108.401908<br>4           | 108.387019                | 108.618852<br>9           | 108.<br>4               | -2.4                                           |          |
| 8  | 127.<br>9                | 124.974939<br>7           | 124.975778<br>5           | 124.577645                | 125.<br>0               | -2.9                                           |          |
| 9  | 118.<br>9                | 118.199433<br>8           | 118.191255<br>1           | 118.246408<br>7           | 118.<br>2               | -0.7                                           |          |
| 10 | 119.<br>7                | 118.307958<br>5           | 118.299675                | 118.139037<br>4           | 118.<br>3               | -1.4                                           |          |
| 11 | 122.<br>8                | 121.112614                | 121.092167<br>3           | 121.123938<br>3           | 121.<br>1               | -1.7                                           |          |
| 12 | 112.<br>1                | 110.303764<br>3           | 110.311313<br>8           | 110.249659<br>2           | 110.<br>3               | -1.8                                           |          |
| 13 | 138.<br>7                | 133.975673<br>7           | 133.991821<br>3           | 133.523749<br>6           | 134.<br>0               | -4.7                                           |          |
| 14 | 20.4                     | 19.6808220<br>6           | 19.6784104                | 20.4961728                | 19.7                    | -0.7                                           |          |
| 15 | 37                       | 37.4852679                | 37.5079165<br>4           | 37.4370347<br>1           | 37.5                    | 0.5                                            |          |
| 16 | 53.6                     | 53.0261088<br>4           | 53.0284156<br>4           | 53.7929118<br>2           | 53.0                    | -0.6                                           |          |
| 17 | 67.9                     | 70.8146167<br>6           | 70.835378                 | 70.0910139<br>5           | 70.8                    | 2.9                                            |          |
| 18 | 11.2                     | 11.4891475<br>3           | 11.4953339<br>6           | 11.3204362                | 11.5                    | 0.3                                            |          |
| 19 | 85.8                     | 83.6287092<br>4           | 83.6111984<br>9           | 83.6337422<br>7           | 83.6                    | -2.2                                           |          |
| 20 | 47.4                     | 45.4747824<br>3           | 45.4749921<br>4           | 45.8289818<br>6           | 45.5                    | -1.9                                           |          |
| 21 | 62.2                     | 61.0407885<br>1           | 61.0514837                | 60.1809793<br>4           | 61.0                    | -1.2                                           |          |
| 22 | 175.<br>5                | 176.654503<br>5           | 176.635839<br>4           | 175.011219<br>5           | 176.<br>6               | 1.1                                            |          |
| 23 | 53                       | 53.1173324                | 53.1402956                | 53.6326937                | 53.1                    | 0.1                                            |          |

|  |  |   |   |   |  |  |  |
|--|--|---|---|---|--|--|--|
|  |  | 9 | 9 | 2 |  |  |  |
|--|--|---|---|---|--|--|--|

### 1.3 ECD calculation

The theoretical calculations were carried out using Gaussian 09.<sup>2</sup> Firstly, conformers were optimized using density functional theory method and at B3LYP/6-31G (d) and filtered by Boltzmann-based population. The remaining conformers were finally calculated to obtain the ECD spectrum. The ECD calculation was conducted using Time-dependent Density functional theory (TD-DFT) at CAM-B3LYP/6-31G (d) level. Rotatory strengths for a total of 70 excited states were calculated. The ECD spectrum was simulated in SpecDis1.70 by overlapping Gaussian functions for each transition according to the following equation.<sup>4</sup>

$$\Delta\varepsilon(E) = \frac{1}{2.297 \times 10^{-39}} \times \frac{1}{\sqrt{2\pi\sigma}} \sum_i^A \Delta E_i R_i e^{-\left(\frac{E-E_i}{2\sigma}\right)^2}$$

where  $\sigma$  represents the width of the band at  $1/e$  height, and  $\Delta E_i$  and  $R_i$  are the excitation energies and rotatory strengths for transition  $i$ , respectively.

---

<sup>4</sup> Bruhn, T.; Schaumloeffel, A.; Hemberger, Y.; Bringmann, G. *Chirality* **2013**, 25, 243–249.

**Table S1** Vasorelaxant activities of compounds 1–3

| Compounds        | Concentration ( $\mu\text{m}$ )                  | Vasorelaxant rate (%) |
|------------------|--------------------------------------------------|-----------------------|
| 1                | 100                                              | 70.93 $\pm$ 3.58      |
| 2                | 100                                              | 80.73 $\pm$ 4.14      |
| 3                | 100                                              | 71.67 $\pm$ 3.46      |
| PTM <sup>a</sup> | EC <sub>50</sub> = 0.11 $\pm$ 0.01 $\mu\text{m}$ |                       |

<sup>a</sup> Phentolamine mesylate (PTM) was used as a positive control.

**Table S2** Anti-inflammatory activity of compounds 1–3 on NO production in LPS-induced RAW264.7 mouse macrophages and the cell survival rates.

| Compounds                   | Inhibition (%)                      | Survival rates (%) of RAW 264.7 at 200 $\mu\text{M}$ |                           |
|-----------------------------|-------------------------------------|------------------------------------------------------|---------------------------|
|                             |                                     | LPS (0 $\mu\text{g/mL}$ )                            | LPS (1 $\mu\text{g/mL}$ ) |
| 1                           | 13.17 $\pm$ 3.00                    | 98.13 $\pm$ 1.76                                     | 95.14 $\pm$ 3.25          |
| 2                           | 18.05 $\pm$ 1.04                    | 97.57 $\pm$ 3.26                                     | 96.74 $\pm$ 2.39          |
| 3                           | 11.73 $\pm$ 0.90                    | 96.48 $\pm$ 3.84                                     | 97.25 $\pm$ 3.12          |
| <i>L</i> -NMMA <sup>b</sup> | IC <sub>50</sub> = 33.74 $\pm$ 2.13 | 92.43 $\pm$ 3.53                                     | 94.48 $\pm$ 2.47          |

<sup>b</sup> NG-Monomethyl-*L*-arginine (*L*-NMMA) was used as a positive control.

Item name: ZFX-3  
Item description:

Channel name: 2: Average Time 0.2384 min : TOF MSe (50-2000) 6eV ESI+ : Centroided : Combined

5.29e7

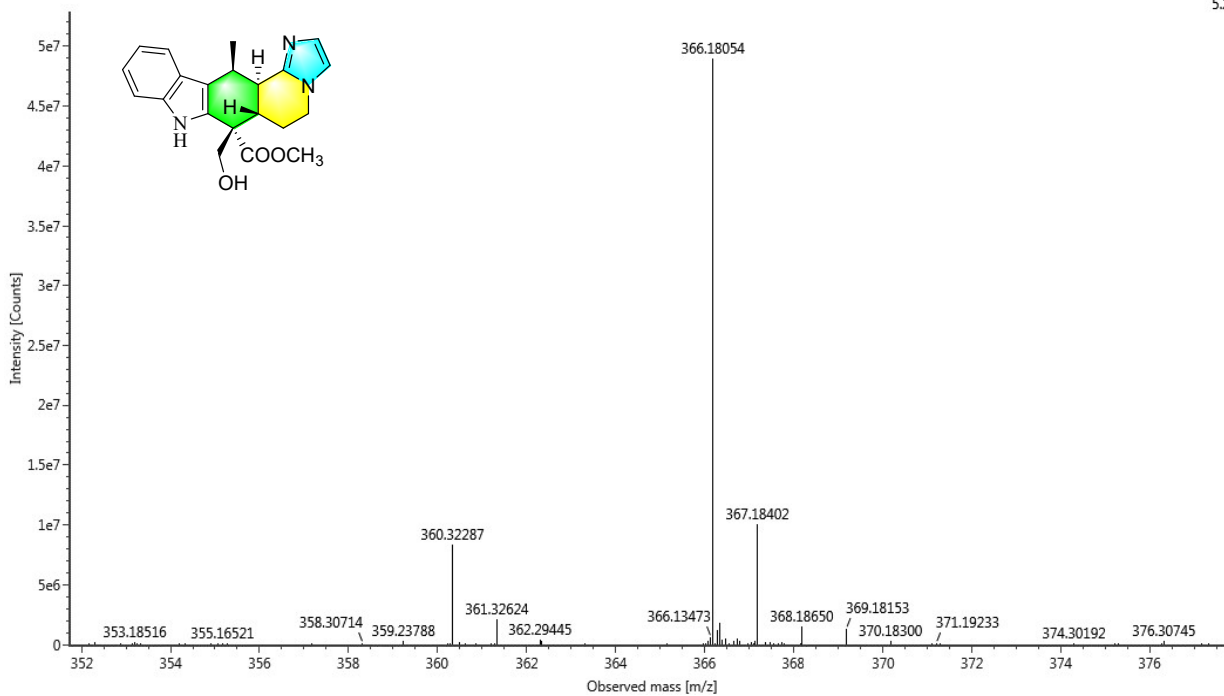

Figure S1. (+)-HR-ESI-MS spectrum of 1

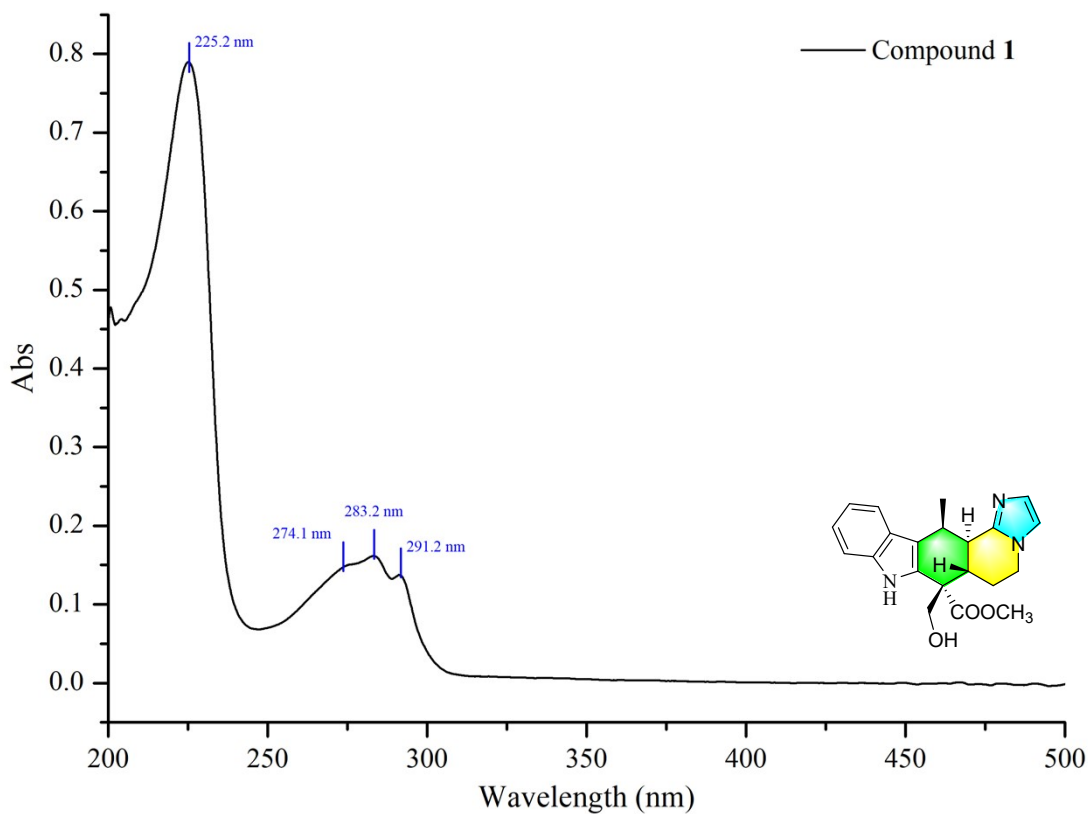

Figure S2. UV spectrum of 1 in MeOH

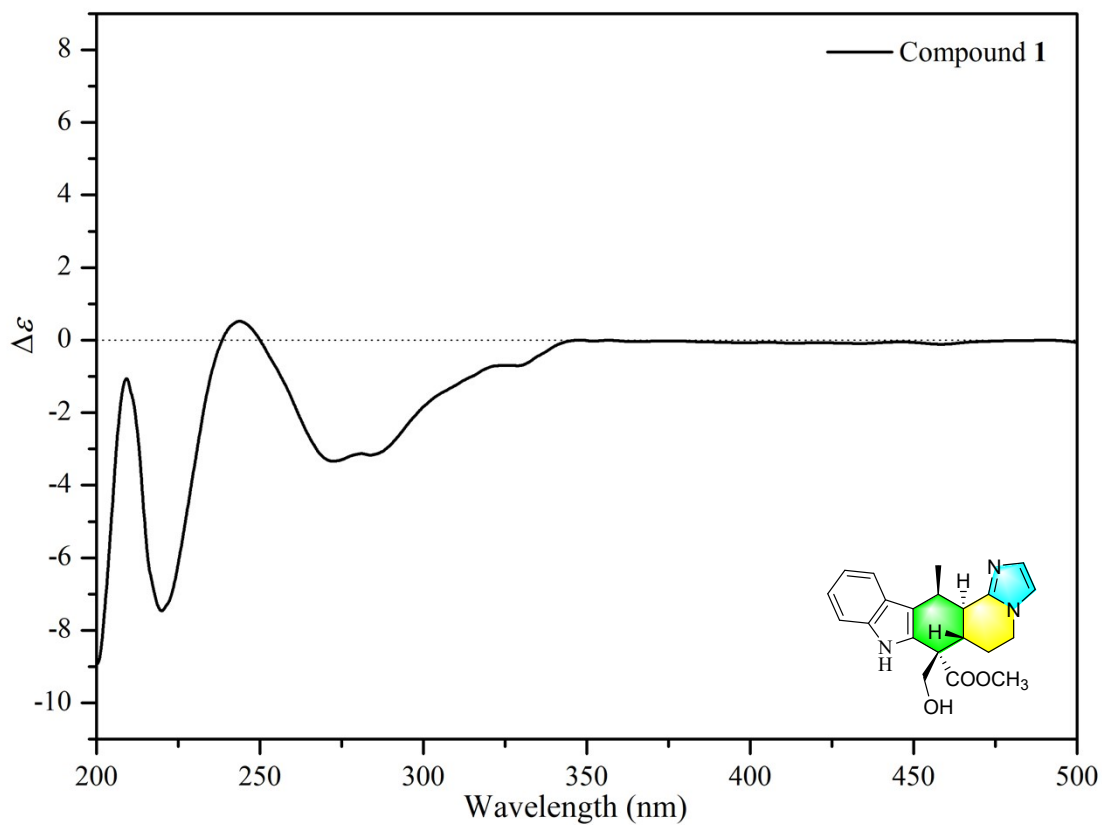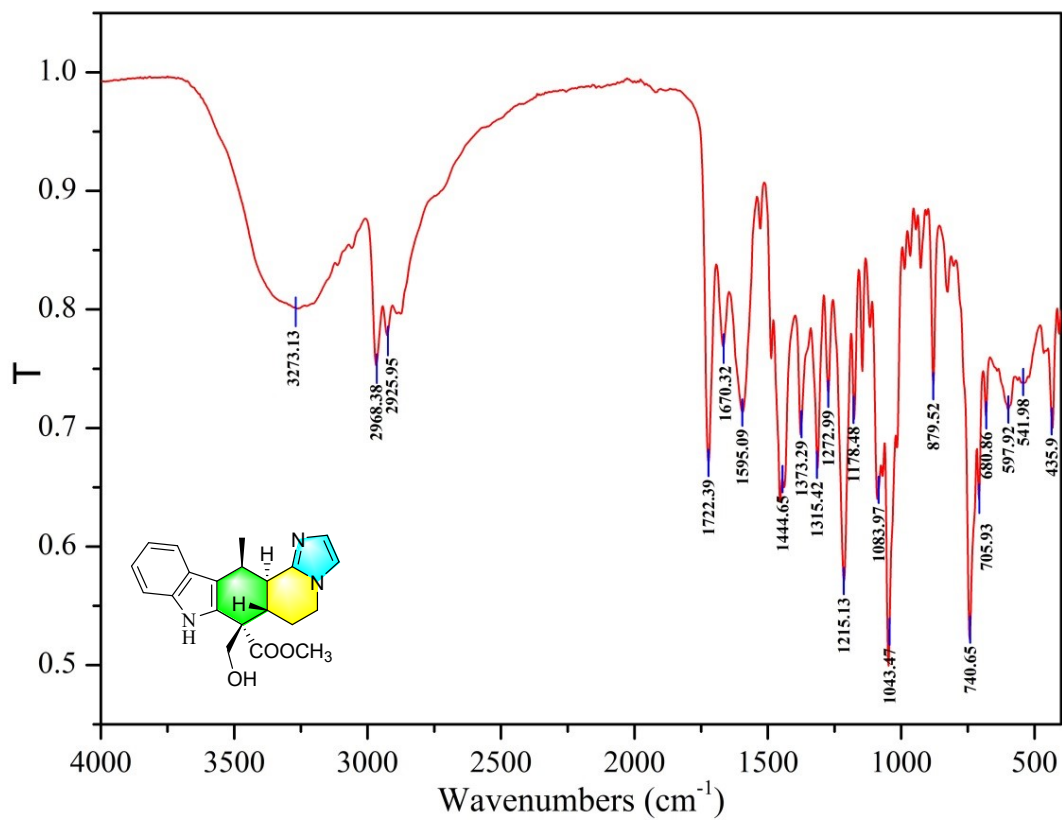

Figure S4. IR spectrum of **1**



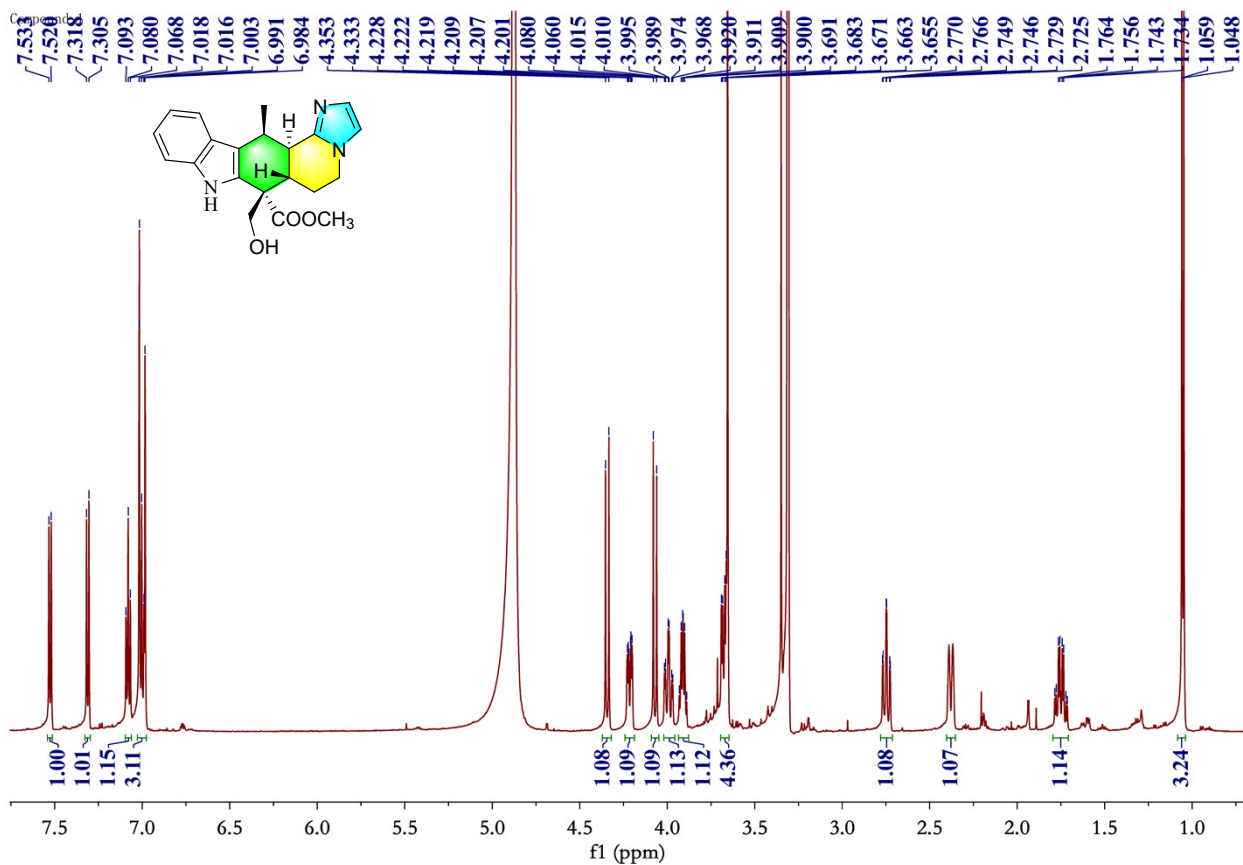

**Figure S5.  $^1\text{H}$  NMR (600 MHz) spectrum of **1** in  $\text{CD}_3\text{OD}$**

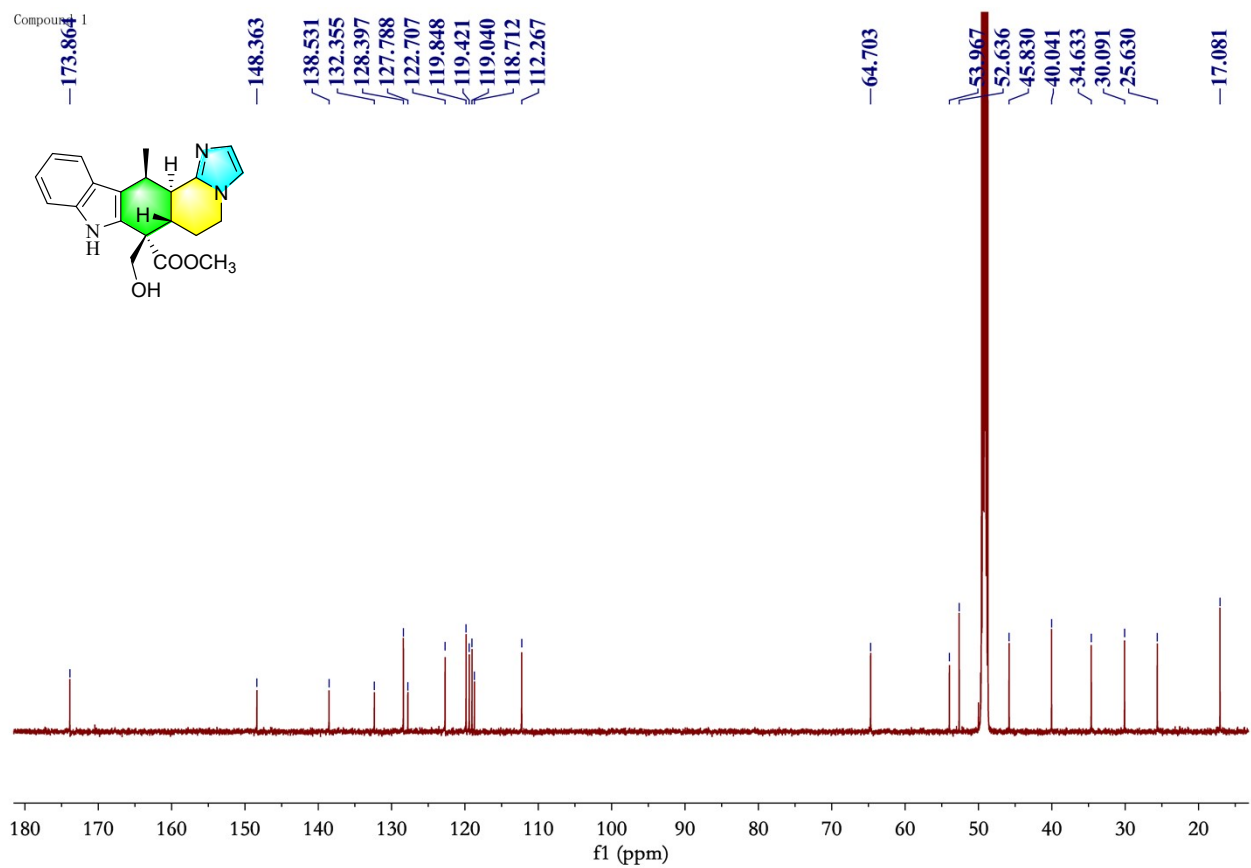

**Figure S6.  $^{13}\text{C}$  NMR (150 MHz) spectrum of **1** in  $\text{CD}_3\text{OD}$**

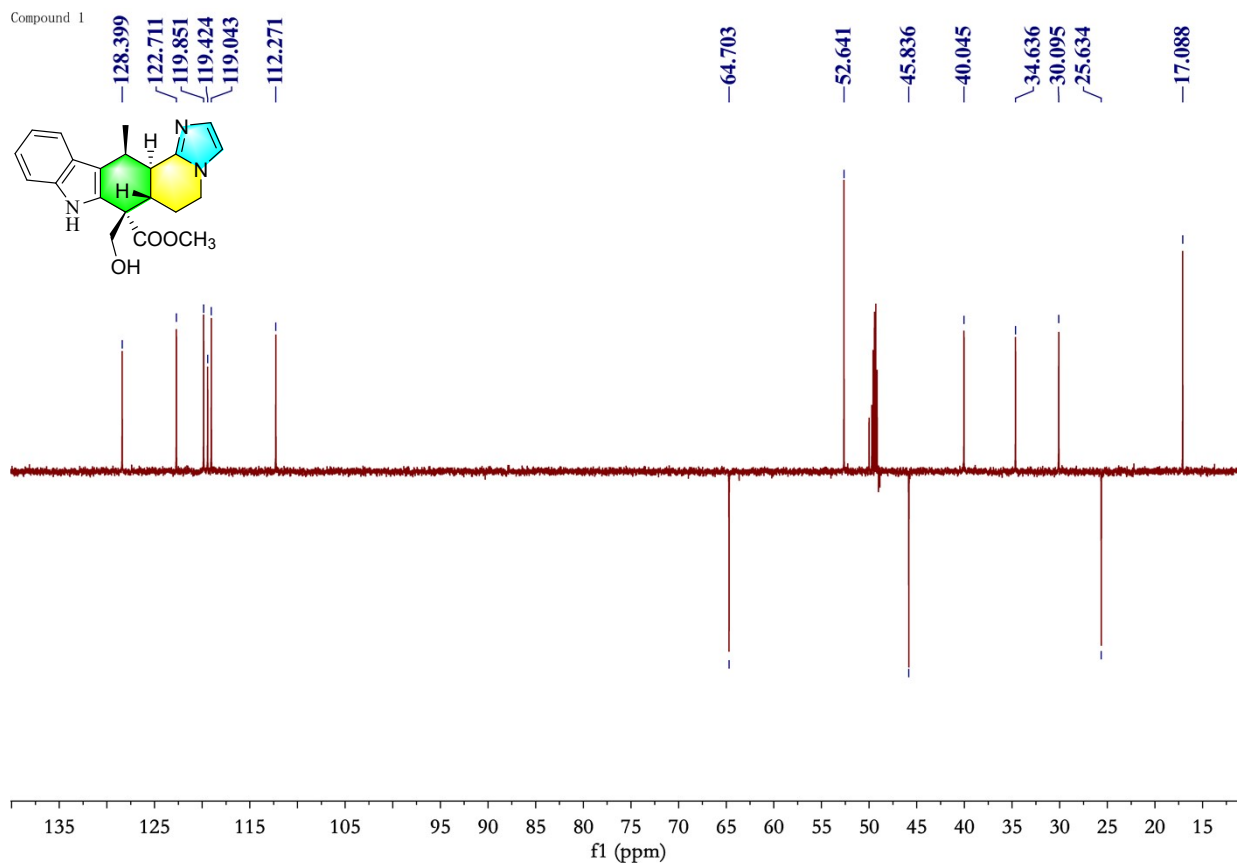

Figure S7. DEPT 135 spectrum of 1 in CD<sub>3</sub>OD

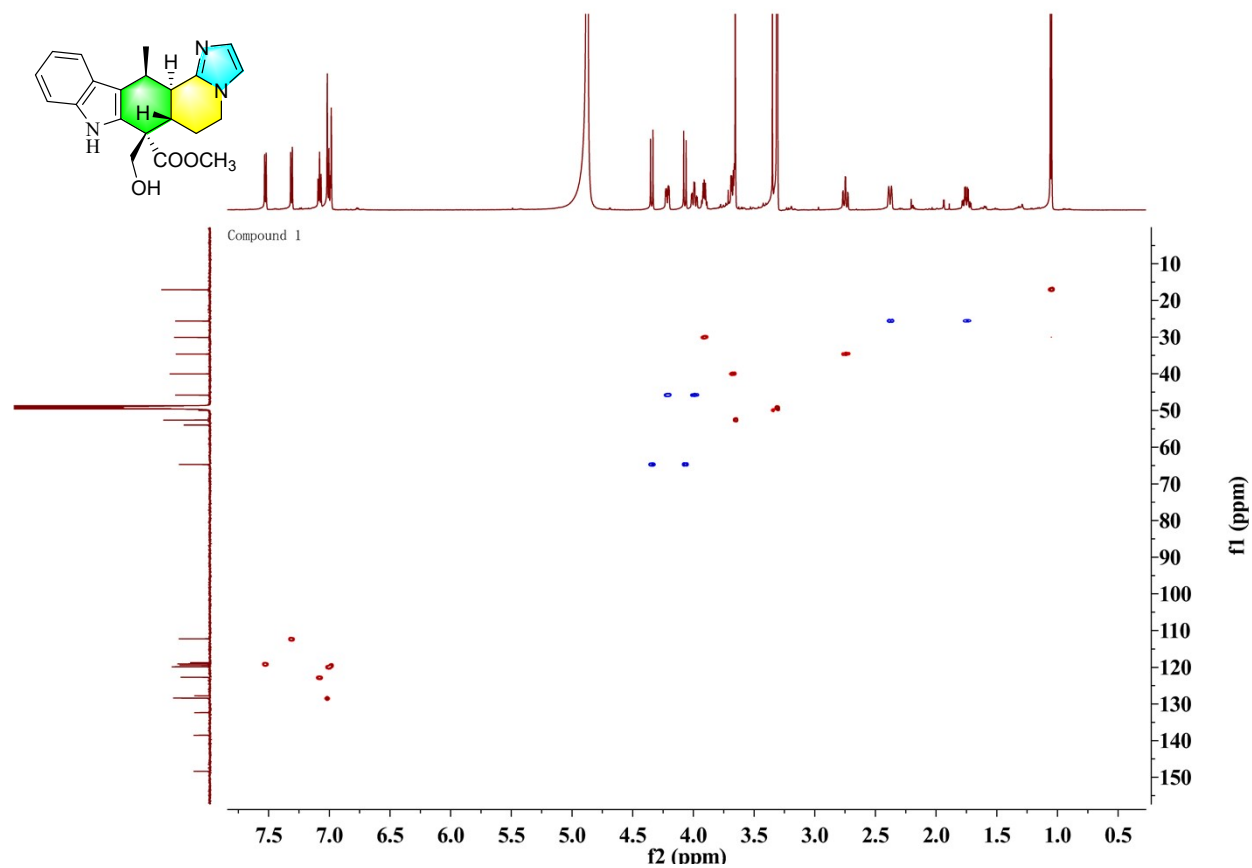

Figure S8. HSQC spectrum of 1 in CD<sub>3</sub>OD

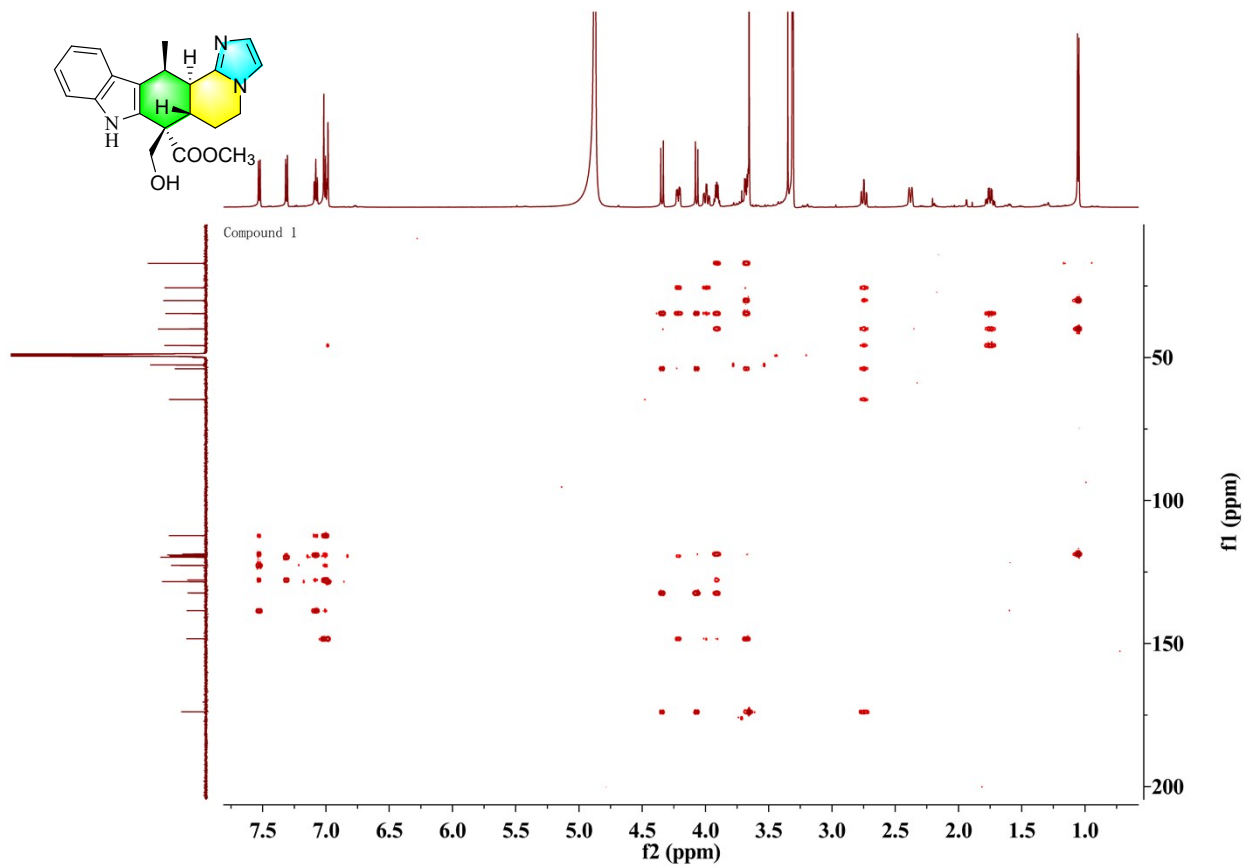

Figure S9. HMBC spectrum of **1** in CD<sub>3</sub>OD

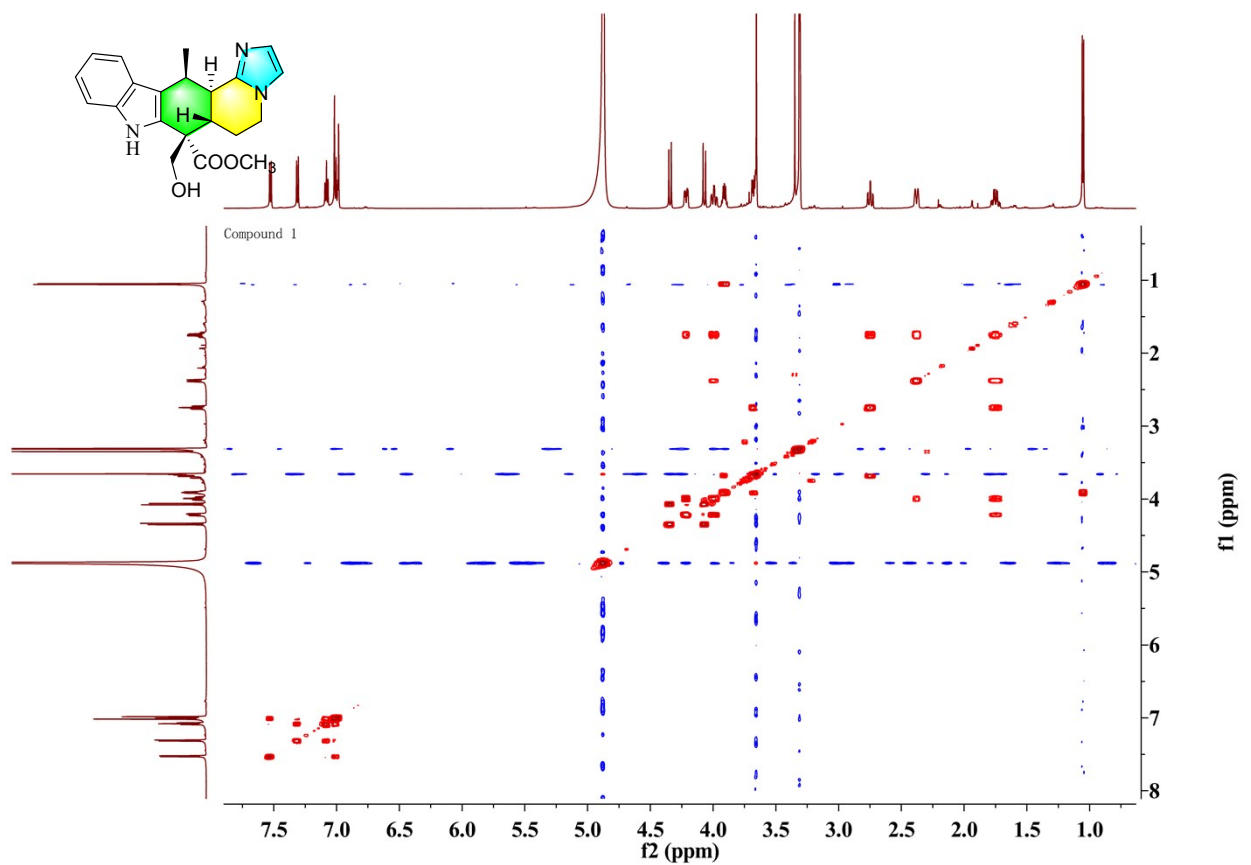

Figure S10. <sup>1</sup>H–<sup>1</sup>H COSY spectrum of **1** in CD<sub>3</sub>OD

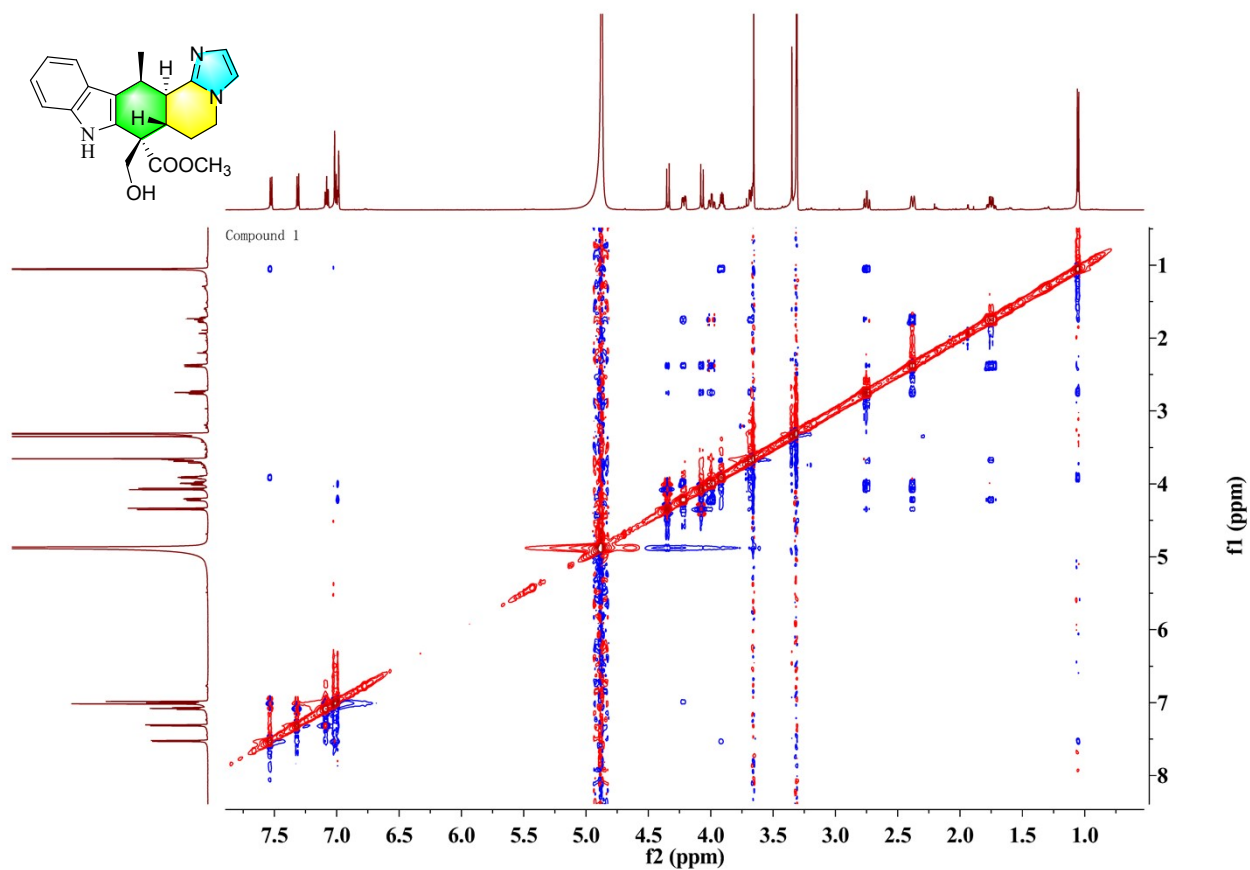

**Figure S11.** NOESY spectrum of **1** in CD<sub>3</sub>OD

Item name: 56-5  
Item description:

Channel name: 2: Average Time 0.1815 min : TOF MSe (50-2000) 6eV ESI+ : Combined

5.58e6

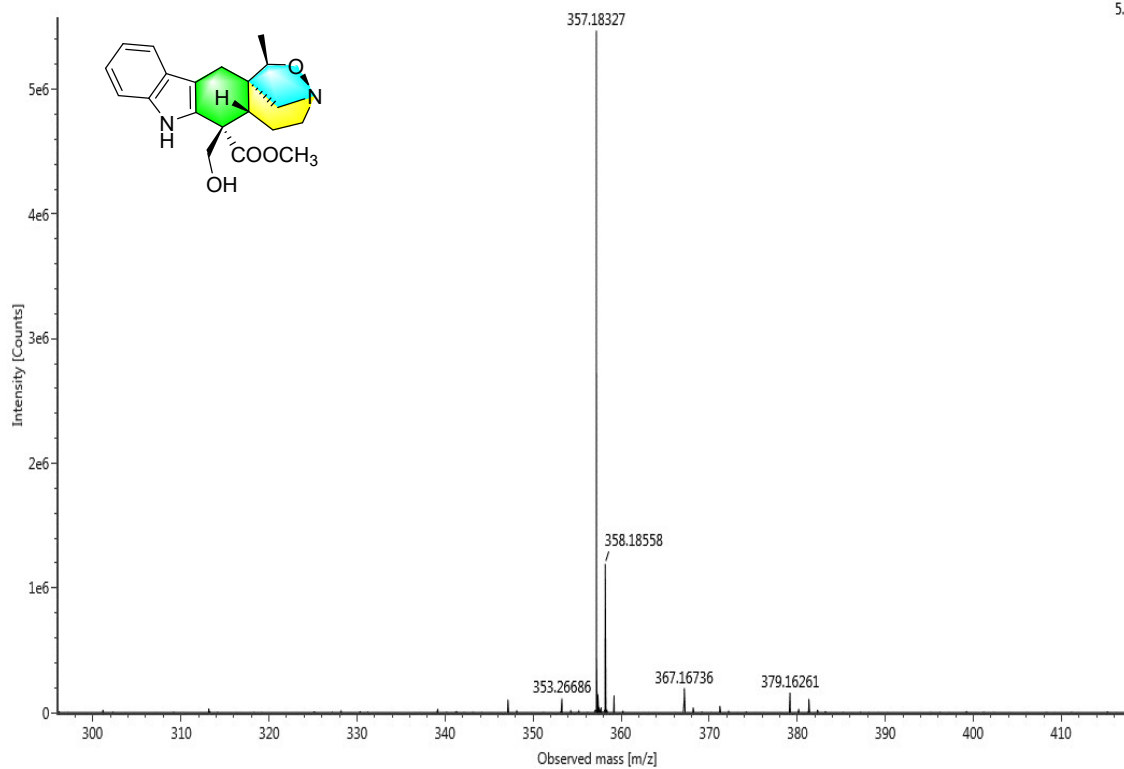

**Figure S12.** (+)-HR-ESI-MS spectrum of **2**

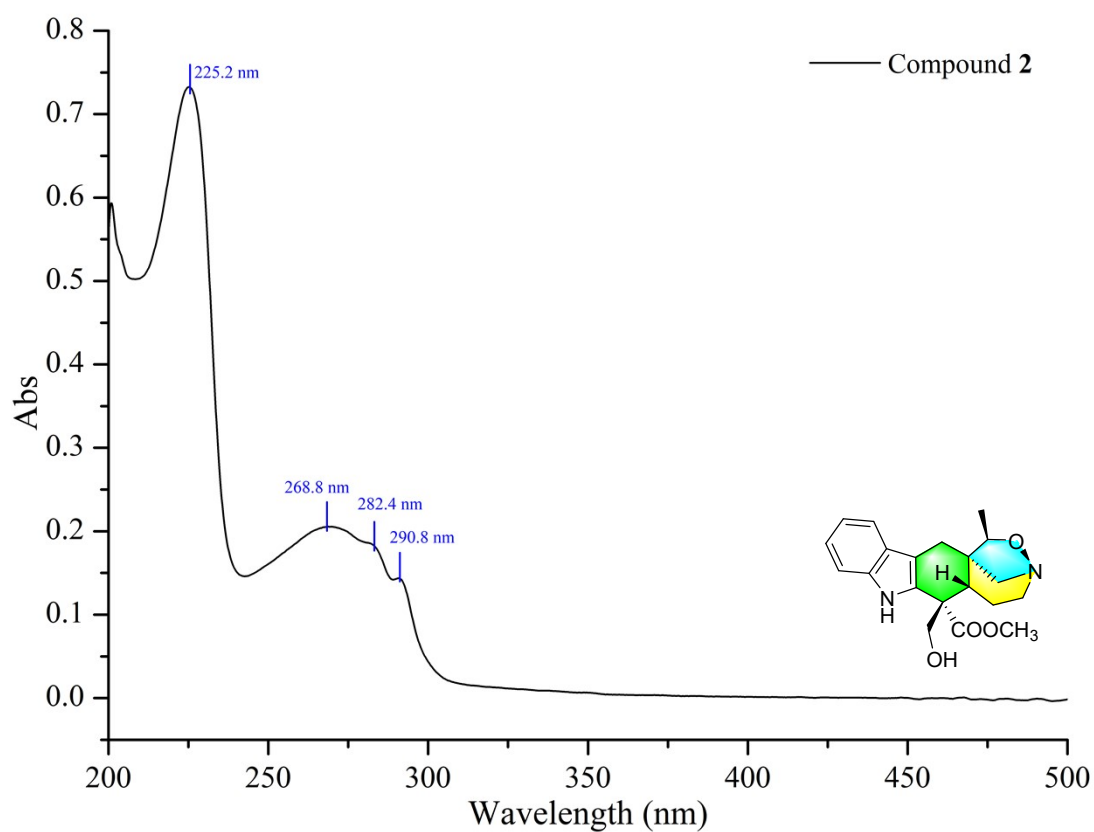

**Figure S13.** UV spectrum of **2** in MeOH

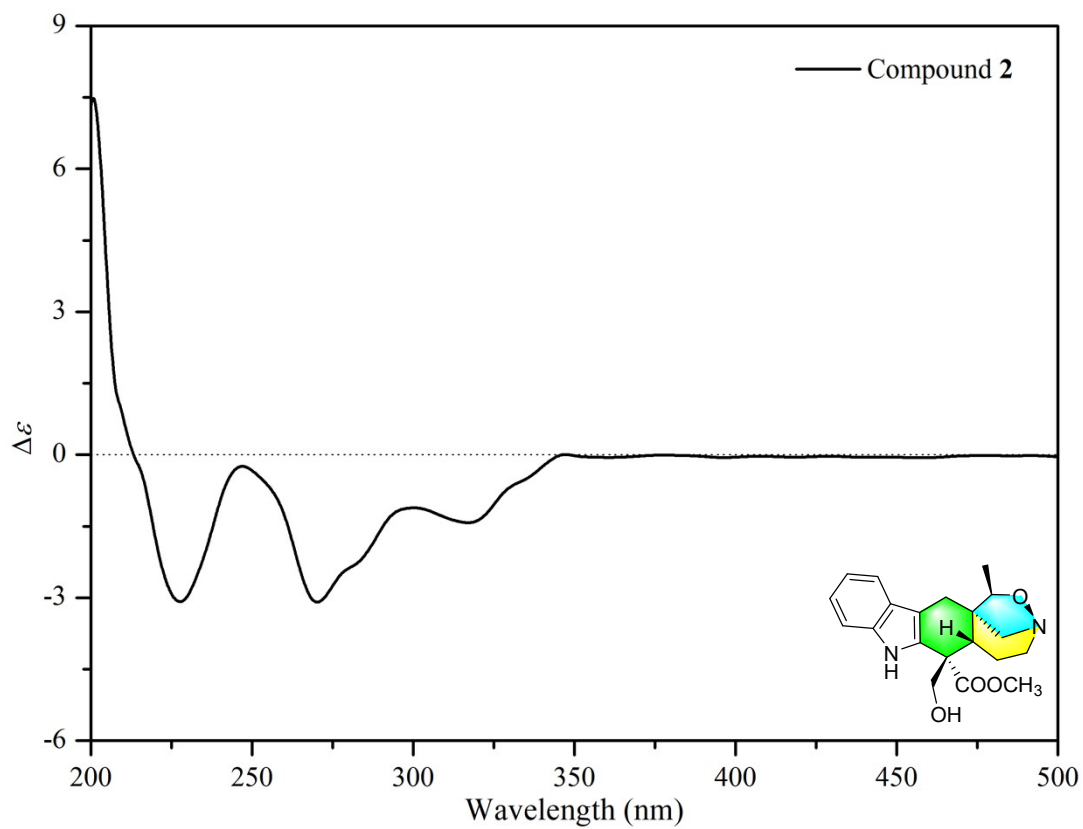

**Figure S14.** ECD spectrum of **2** in MeOH

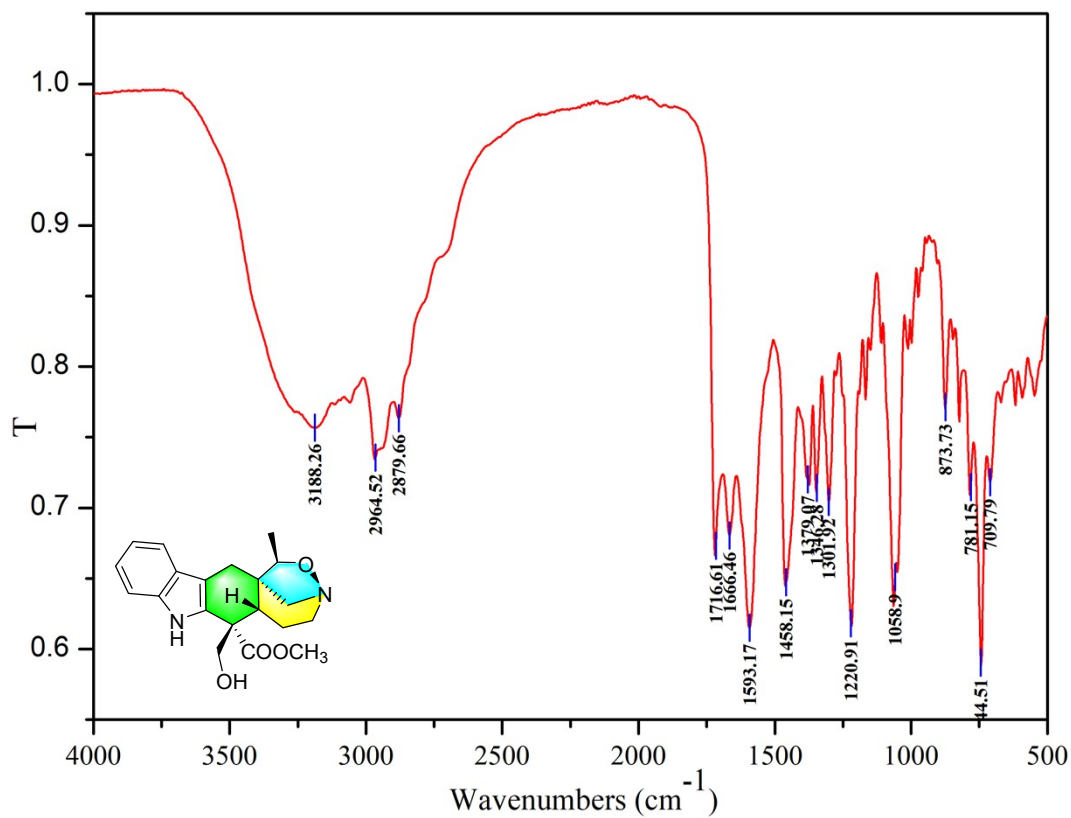

Figure S15. IR spectrum of **2**

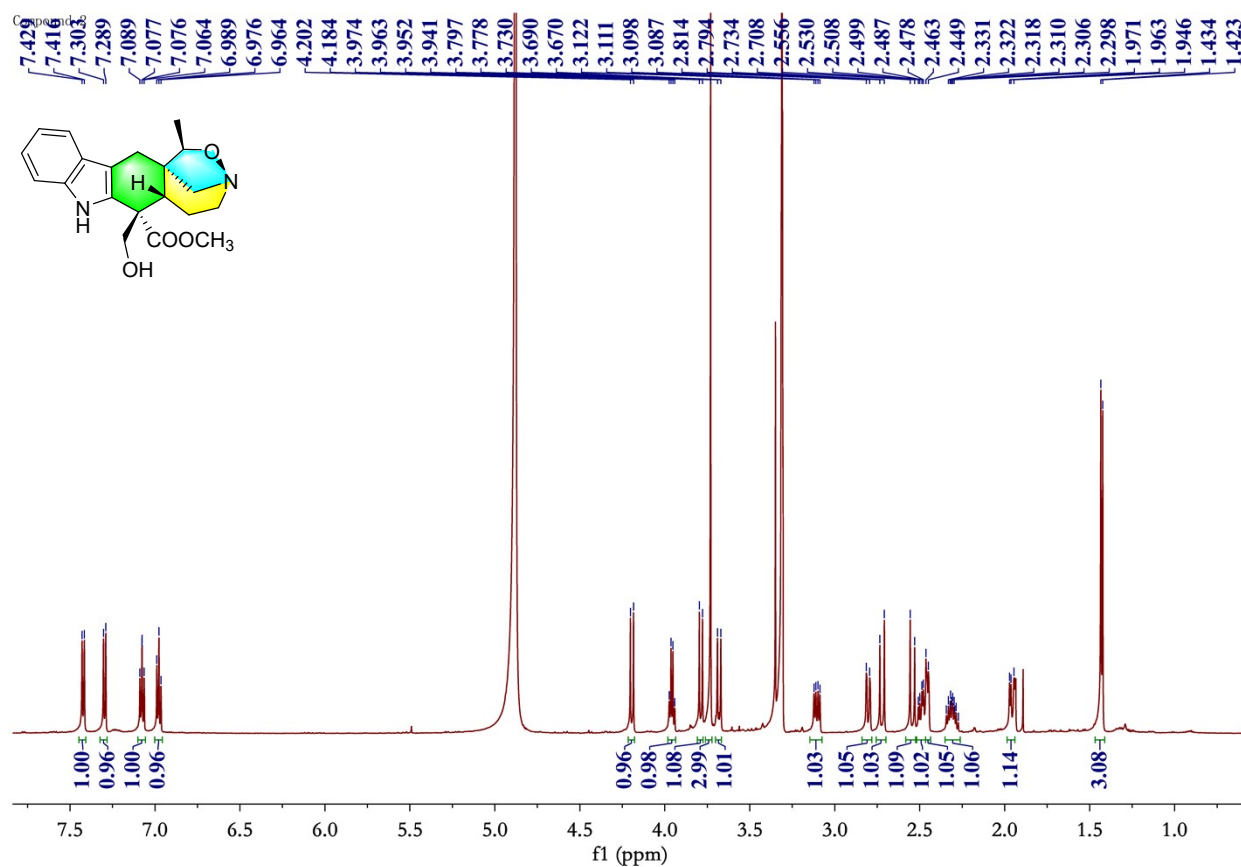

Figure S16.  $^1\text{H}$  NMR (600 MHz) spectrum of **2** in  $\text{CD}_3\text{OD}$

Compound 2

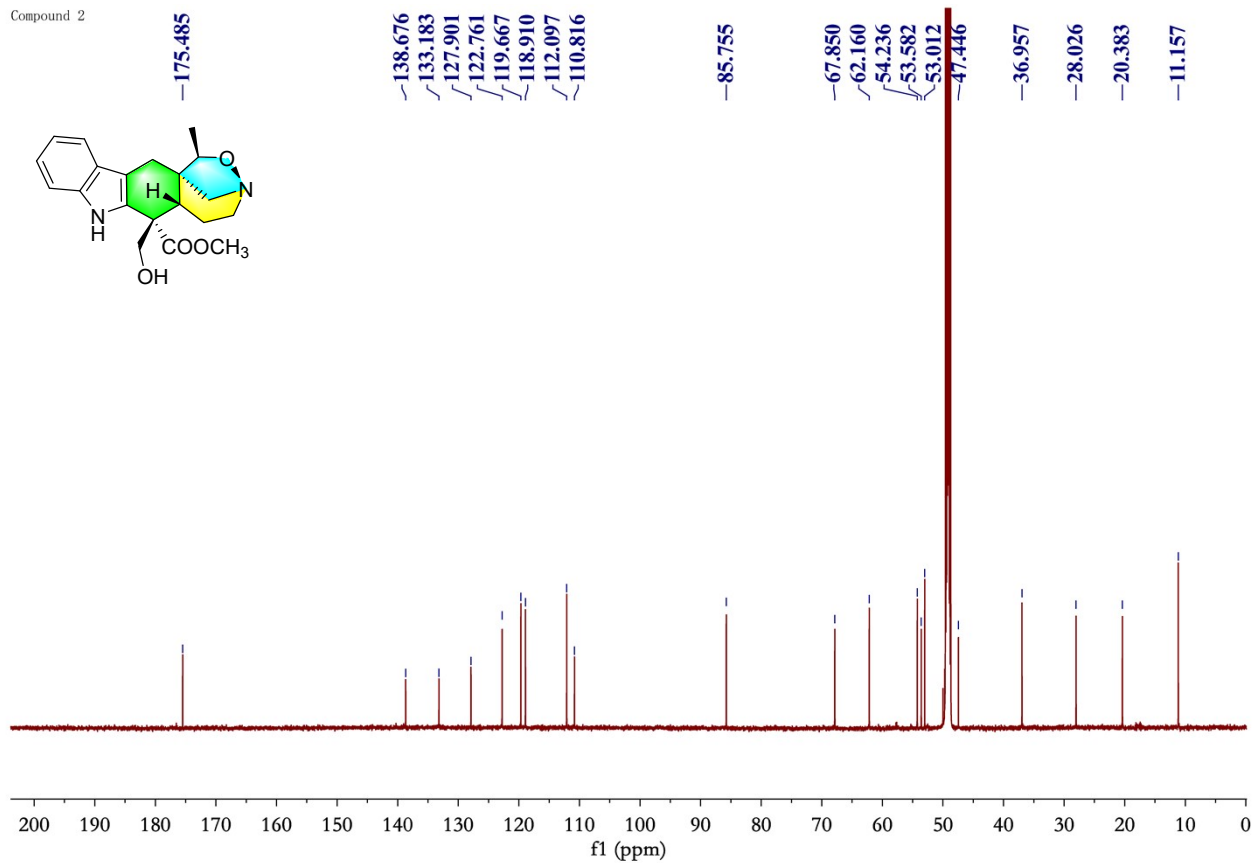

Figure S17. <sup>13</sup>C NMR (150 MHz) spectrum of 2 in CD<sub>3</sub>OD

Compound 2

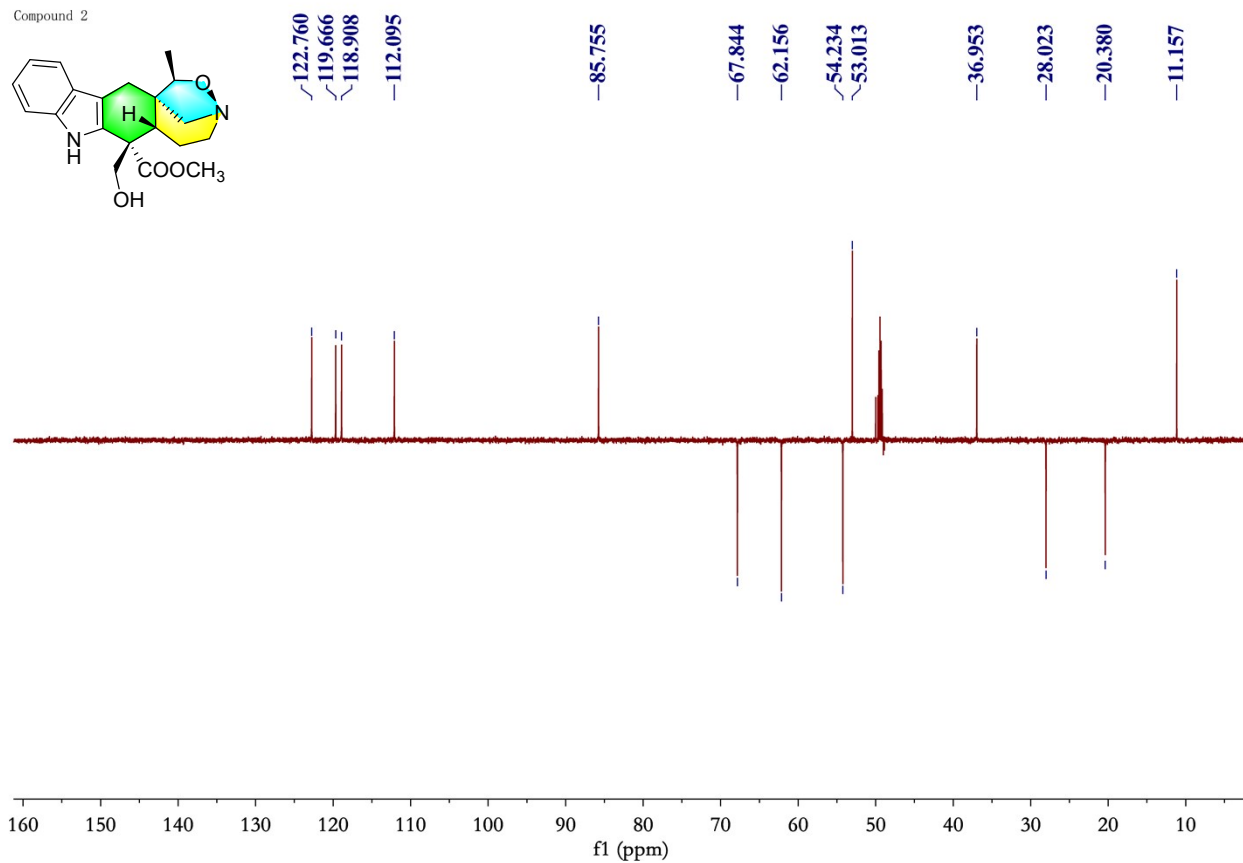

Figure S18. DEPT 135 spectrum of 2 in CD<sub>3</sub>OD

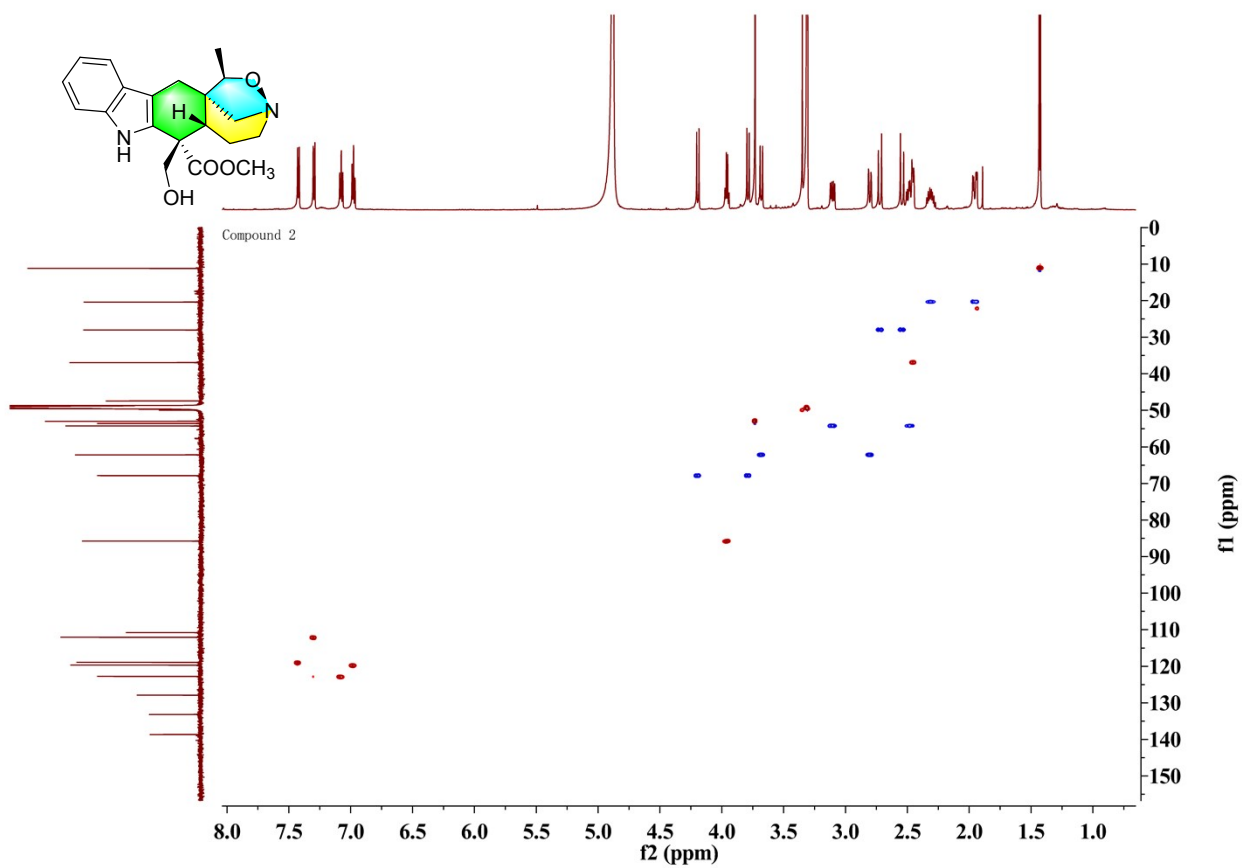

Figure S19. HSQC spectrum of 2 in CD<sub>3</sub>OD

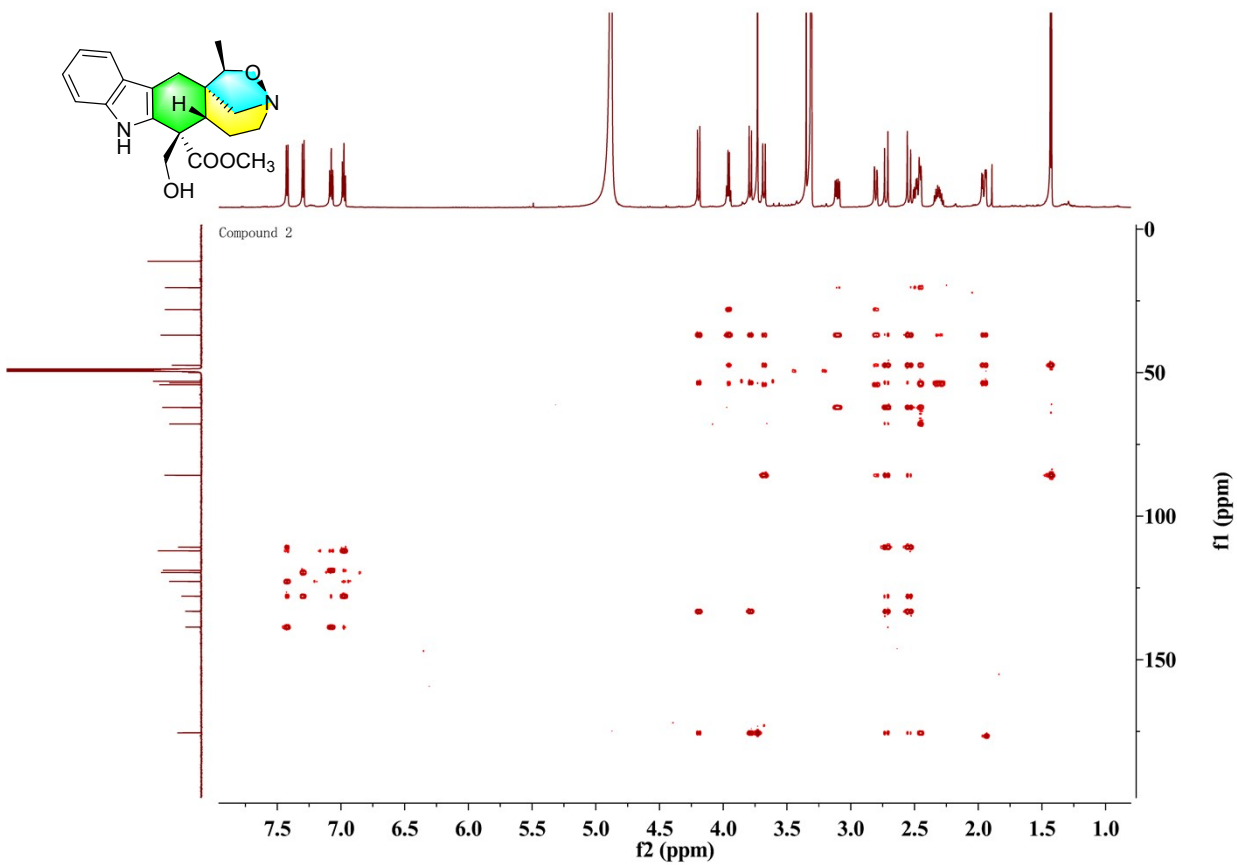

Figure S20. HMBC spectrum of 2 in CD<sub>3</sub>OD



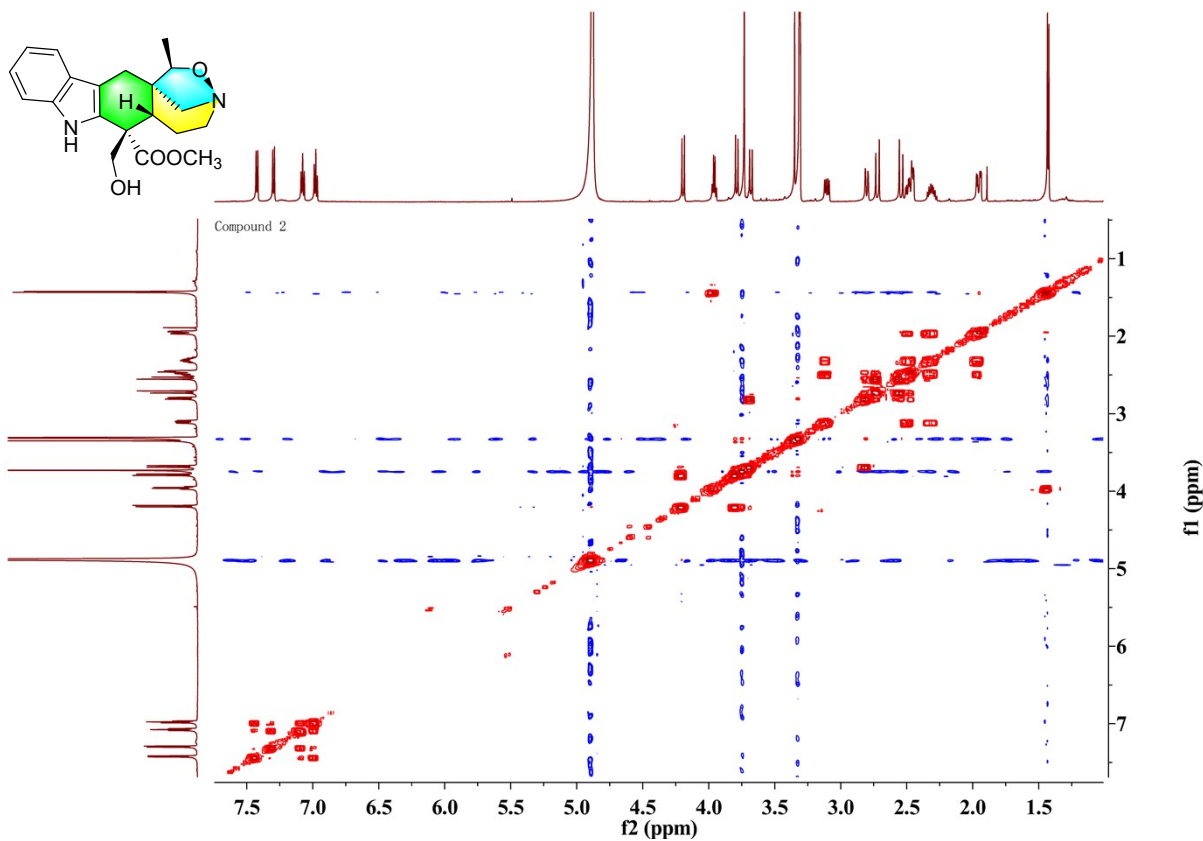

Figure S21.  $^1\text{H}$ - $^1\text{H}$  COSY spectrum of **2** in  $\text{CD}_3\text{OD}$

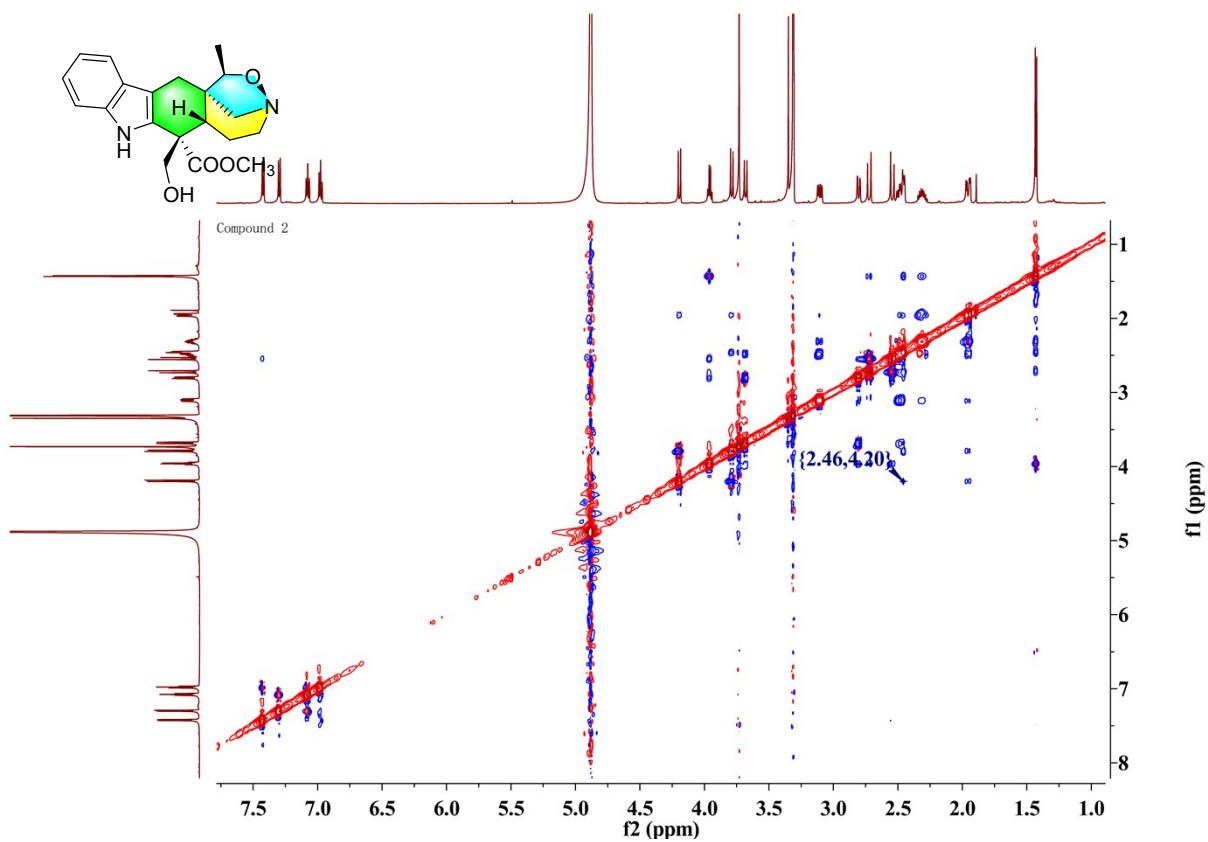

Figure S22. NOESY spectrum of **2** in  $\text{CD}_3\text{OD}$
